# Supplementary material for: Population genomic analyses of early-phase Atlantic Salmon (Salmo salar) domestication/captive breeding
Source: PubMed Central journal article supplement (PMC4310584; doi:10.1111/eva.12230), 2014-11-20

Saint John strain  $r^2$

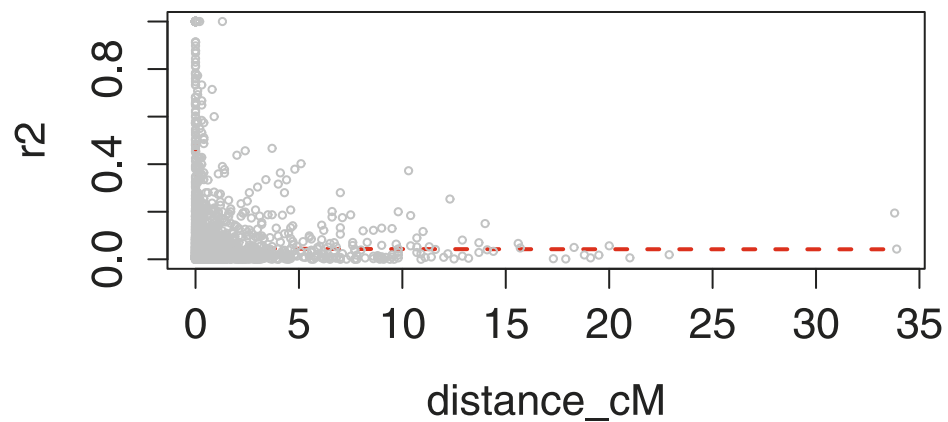

Saint John strain  $D'$

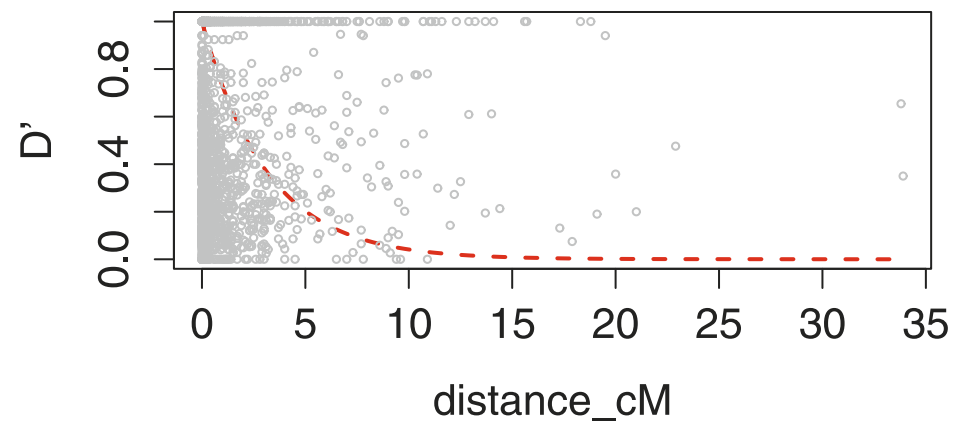

Saint John wild  $r^2$

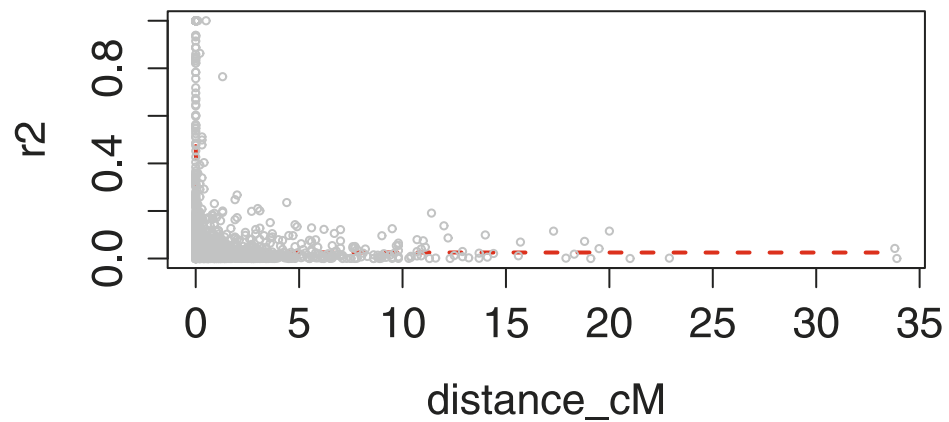

Saint John wild  $D'$

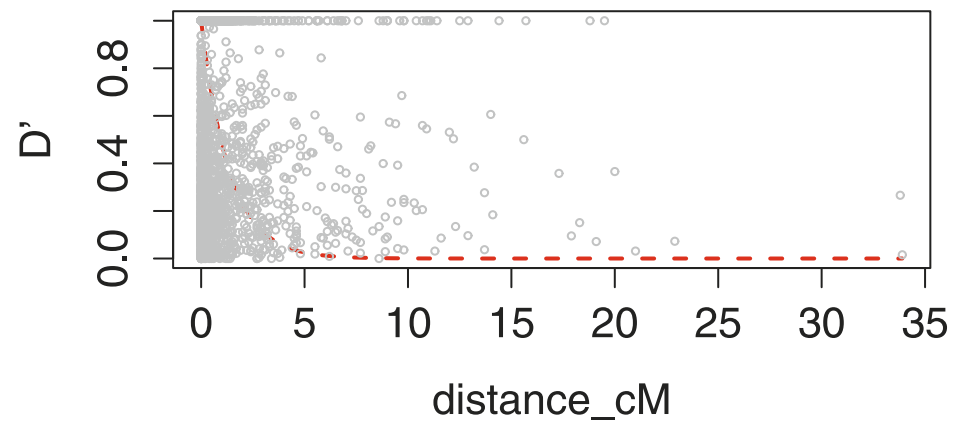

Burrishoole strain  $r^2$

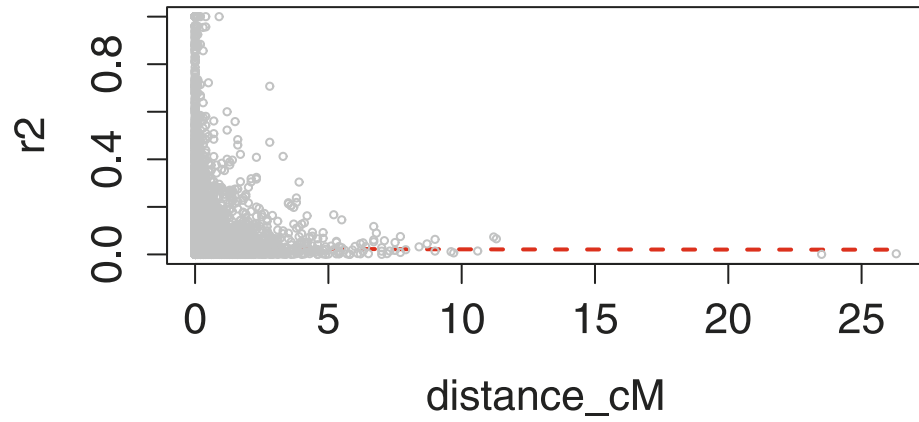

Burrishoole strain  $D'$

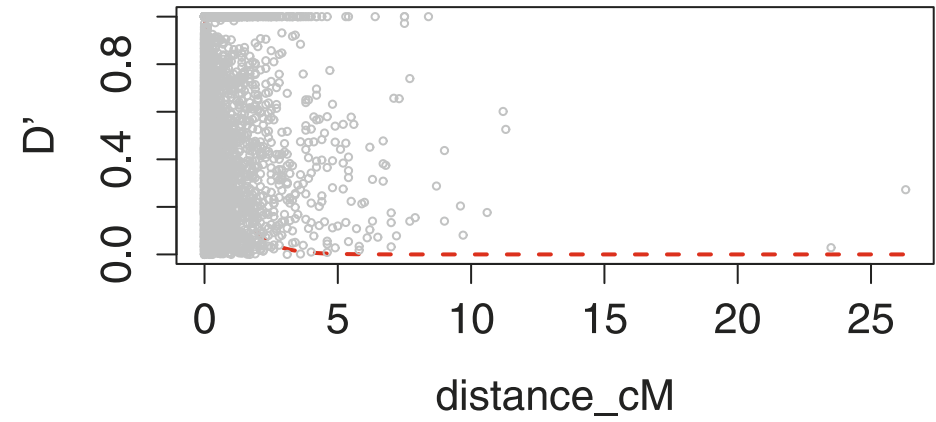

Burrishoole wild  $r^2$

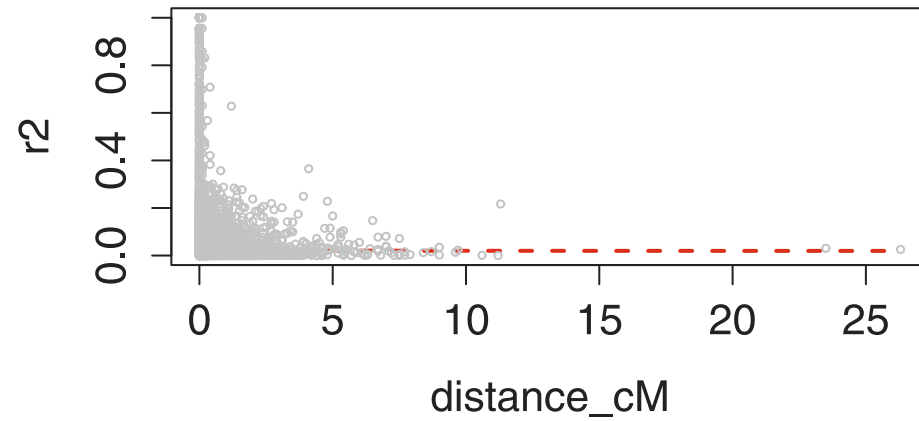

Burrishoole wild  $D'$

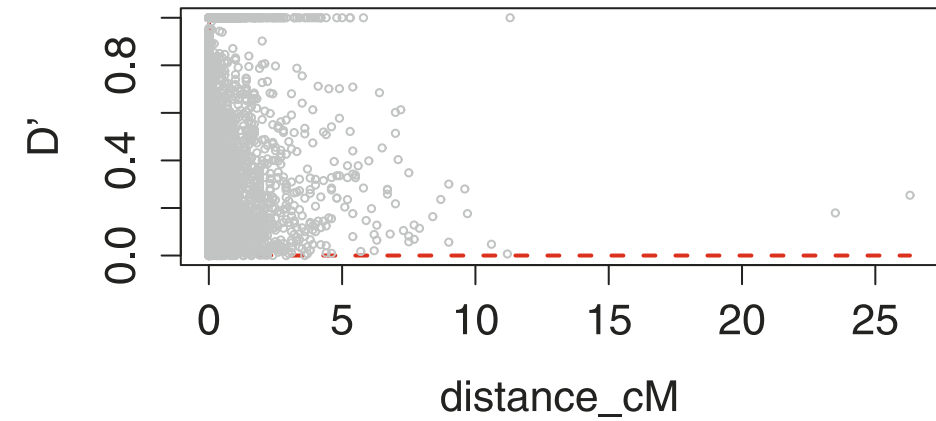

Vindel/Ume strain  $r^2$

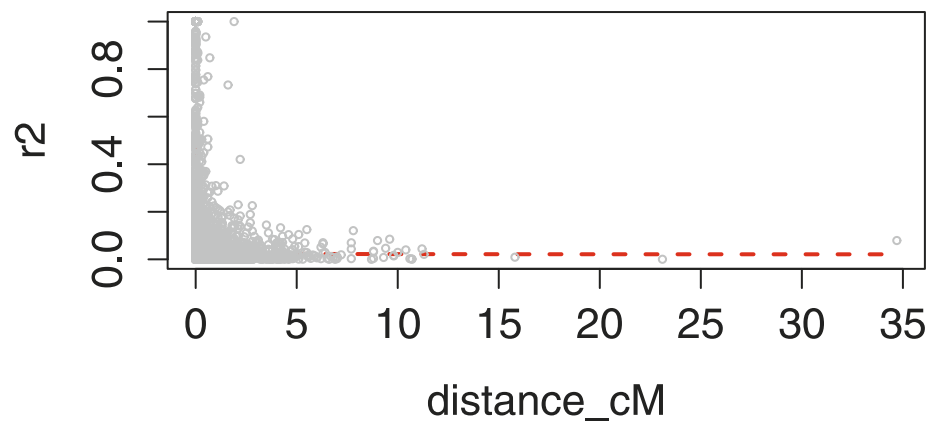

Vindel/Ume strain  $D'$

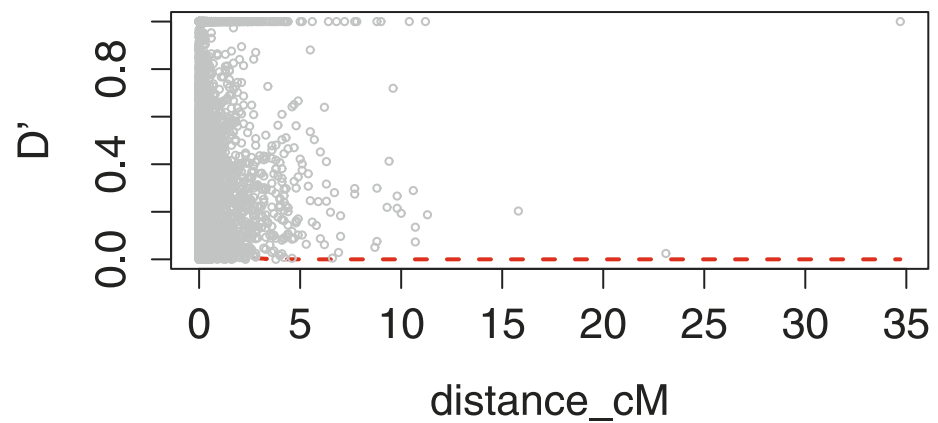

Vindel/Ume wild  $r^2$

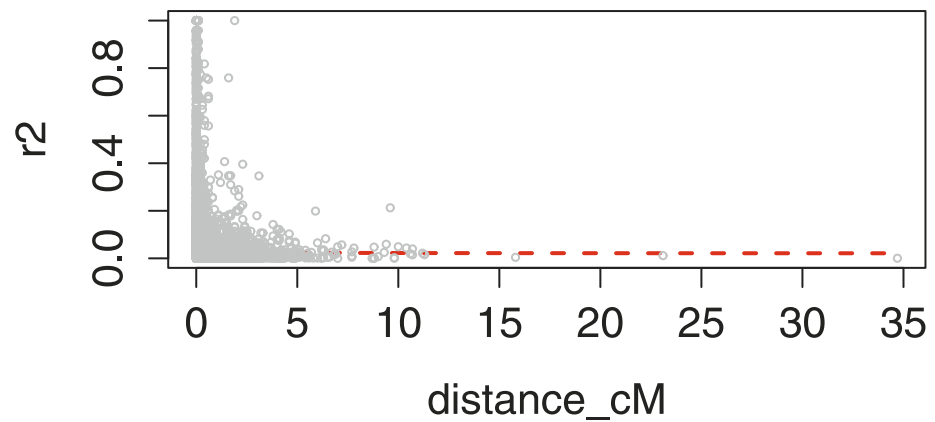

Vindel/Ume wild  $D'$

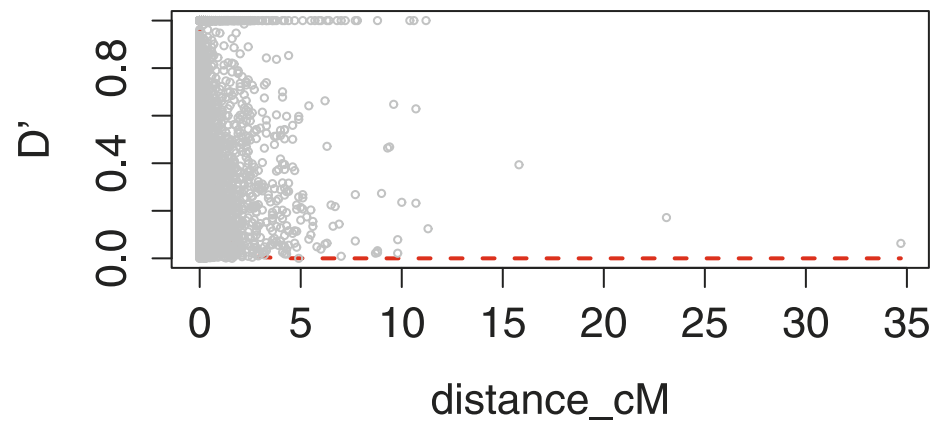

Supplement: eva0008-0093-sd2.pdf [file eva0008-0093-sd2.pdf]
