# Supplementary material for: Population genomic analyses of early-phase Atlantic Salmon (Salmo salar) domestication/captive breeding
Source: PubMed Central journal article supplement (PMC4310584; doi:10.1111/eva.12230), 2014-11-20

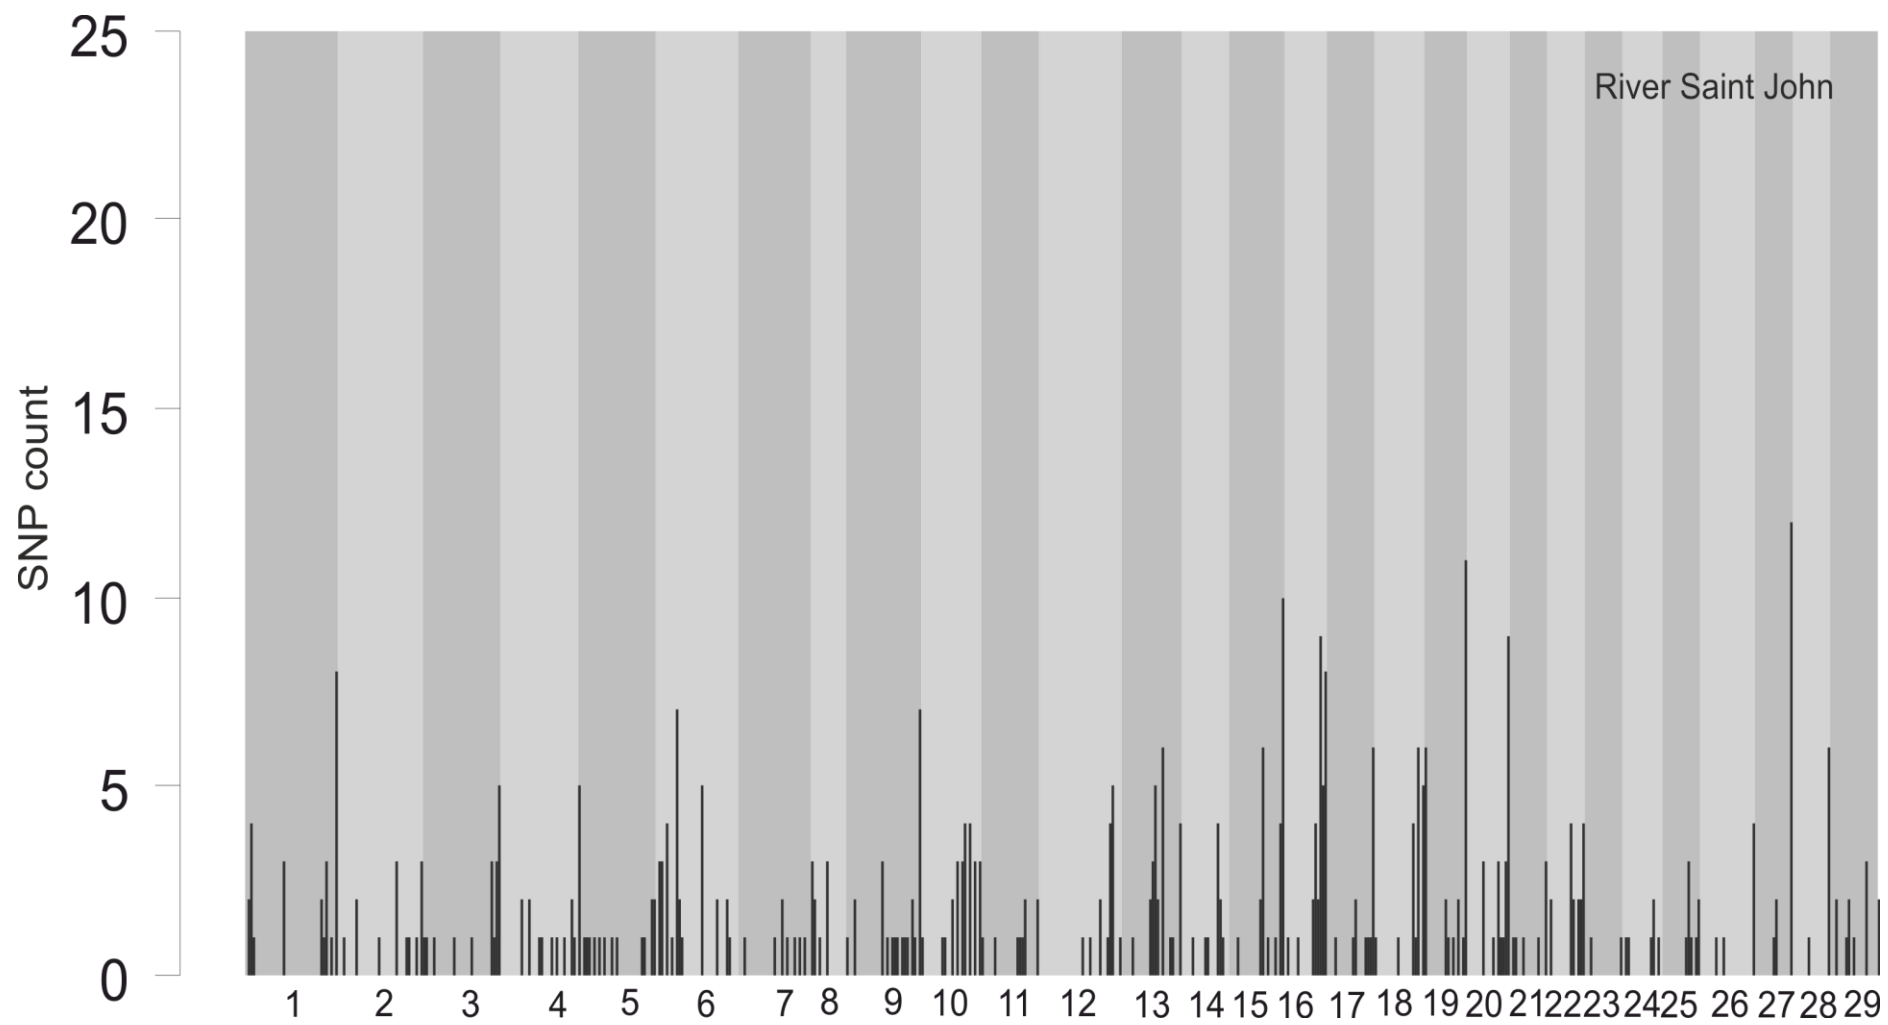

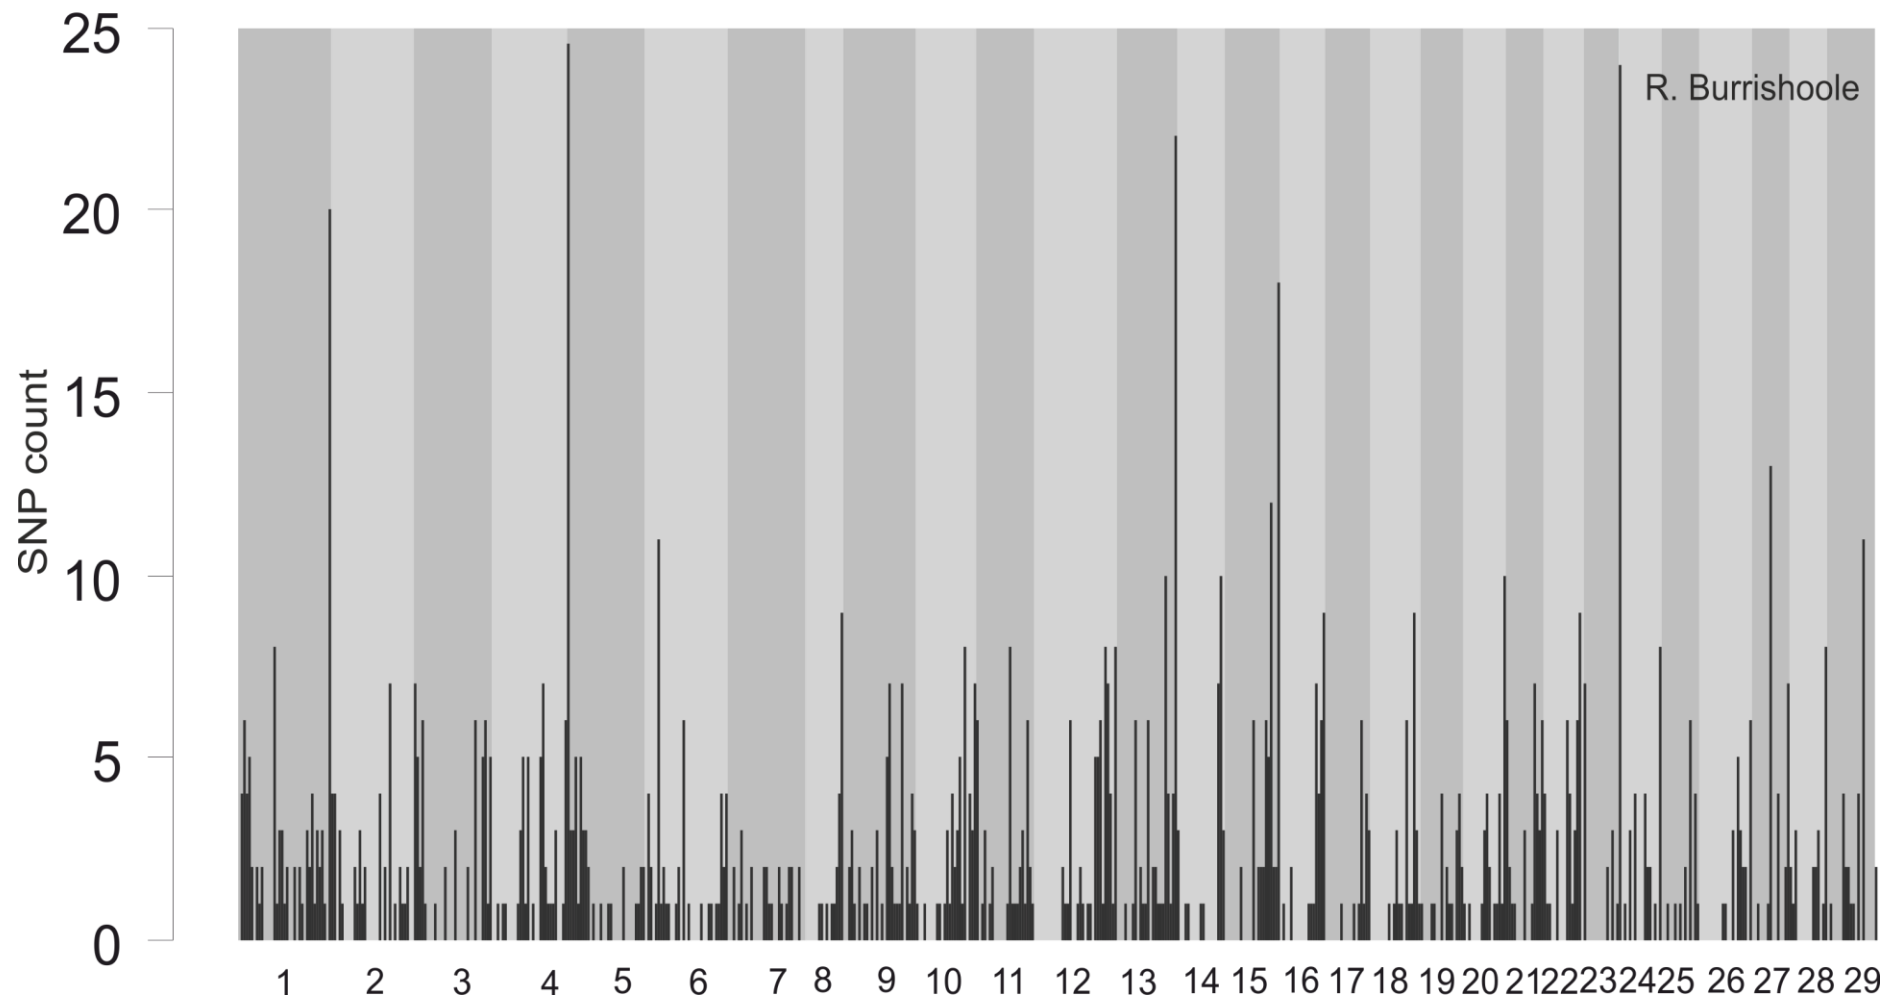

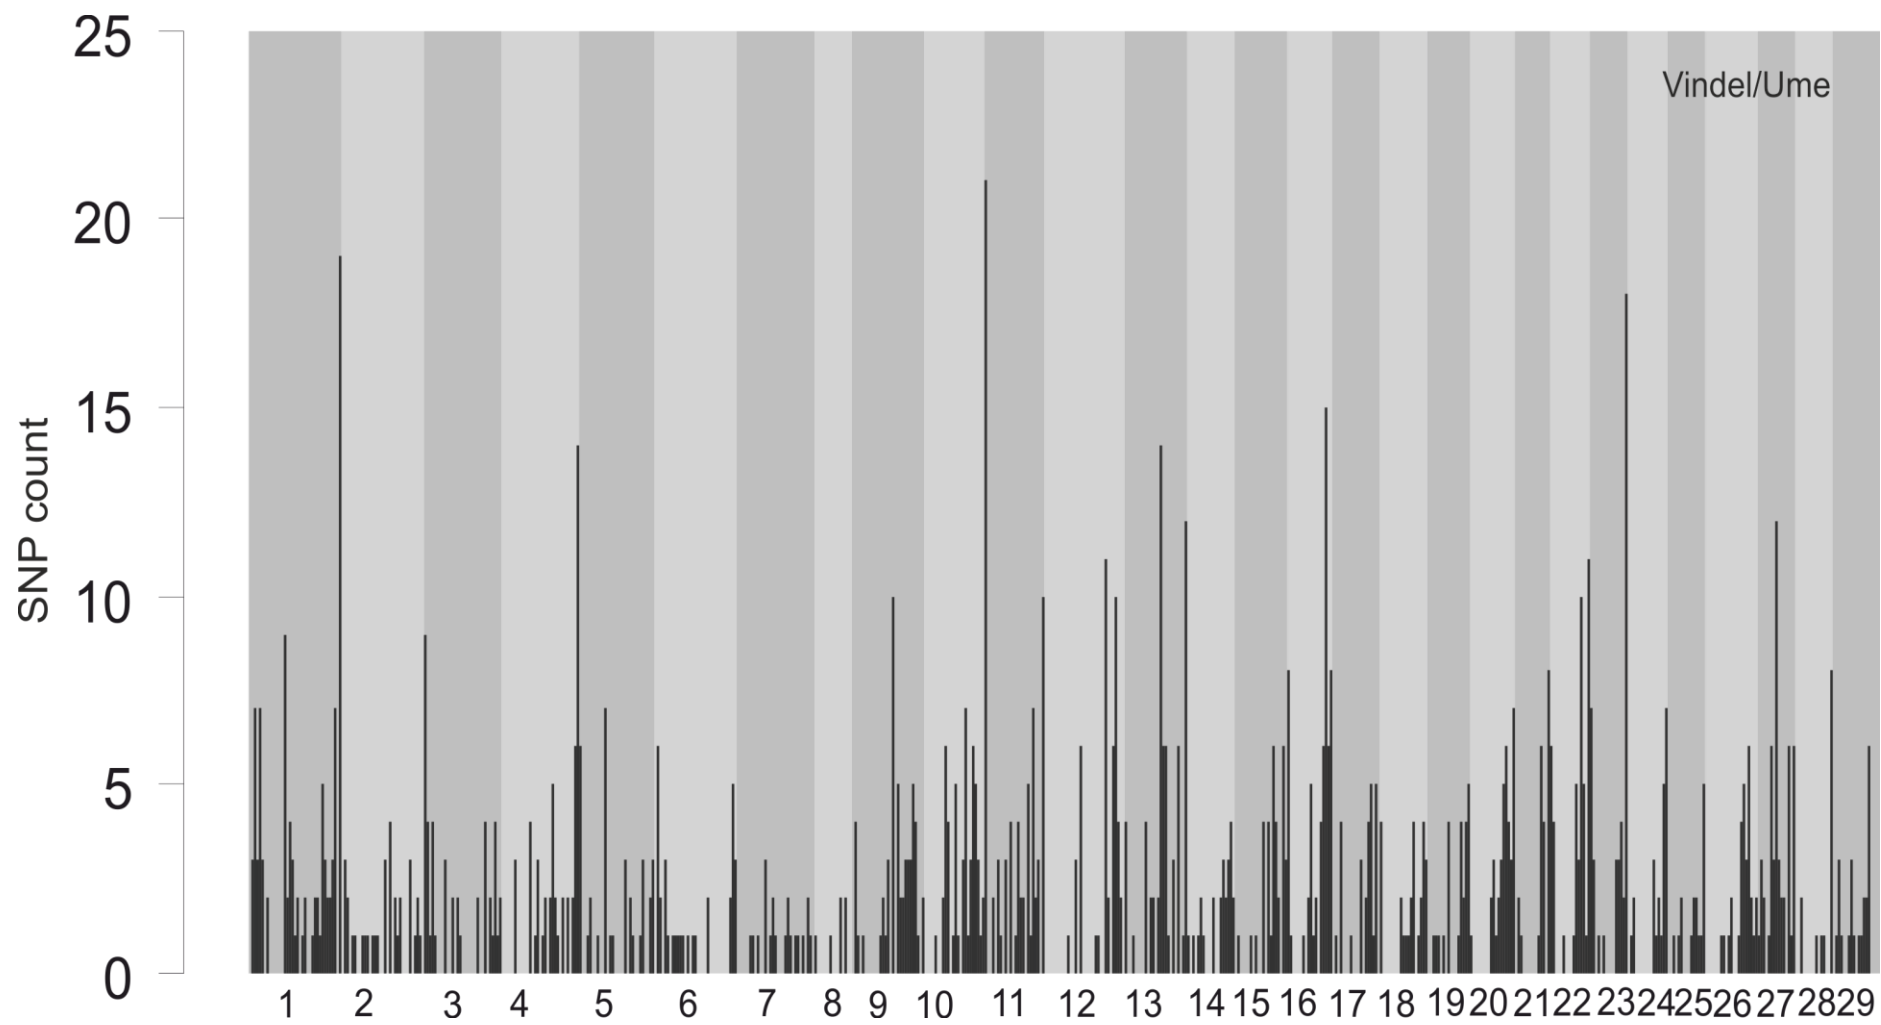

Supplement: eva0008-0093-sd3.pdf [file eva0008-0093-sd3.pdf]
