# Supplementary material for: Population genomic analyses of early-phase Atlantic Salmon (Salmo salar) domestication/captive breeding
Source: Evol Appl. 2014 Nov 20;8(1):93–107. doi: 10.1111/eva.12230 (PMC4310584; doi:10.1111/eva.12230)

Saint John strain LG 9

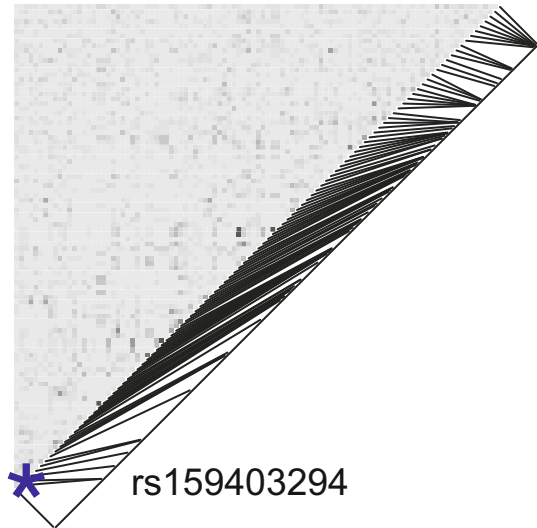

Saint John wild LG 9

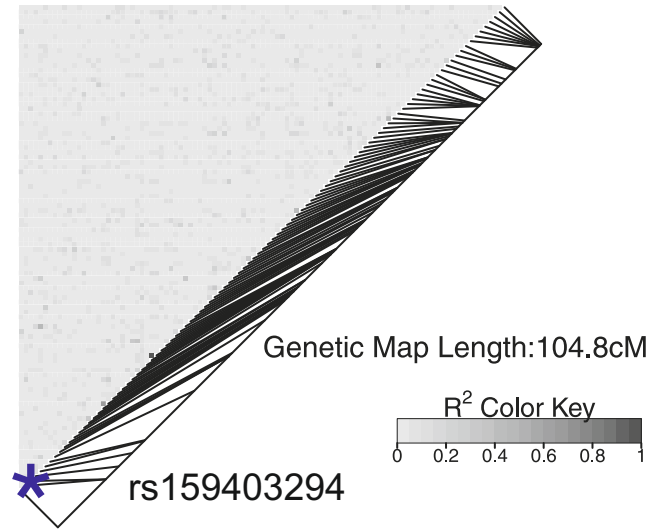

Saint John strain LG 12

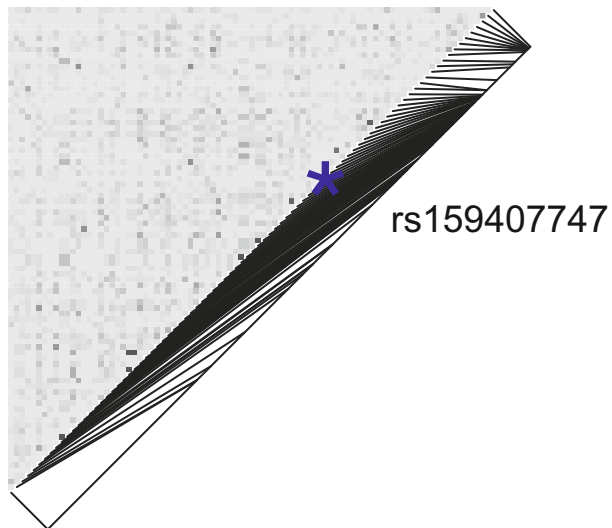

Saint John wild LG 12

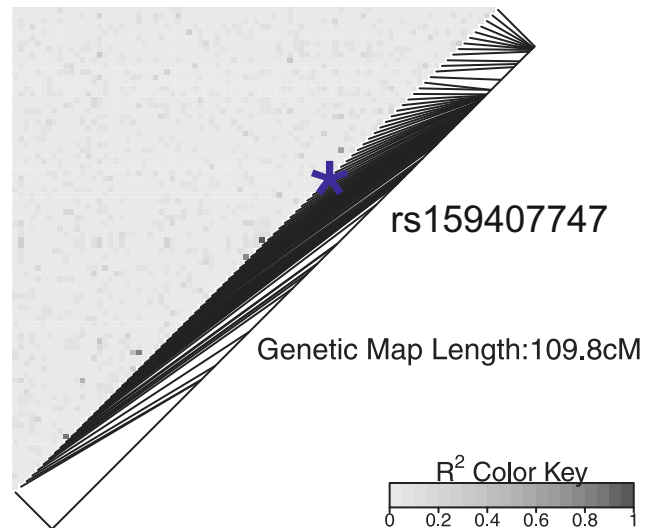

Saint John strain LG 19

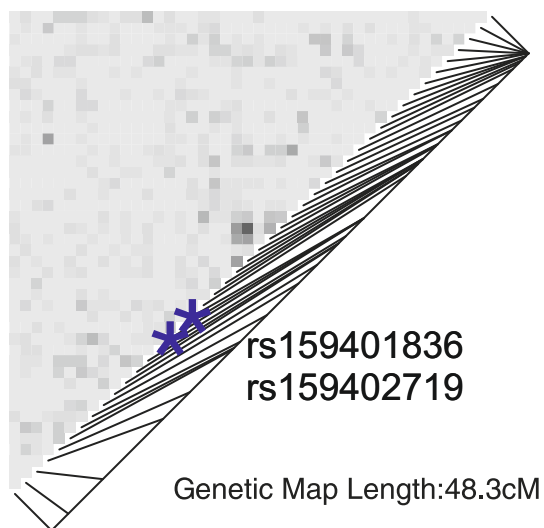

Saint John wild LG 19

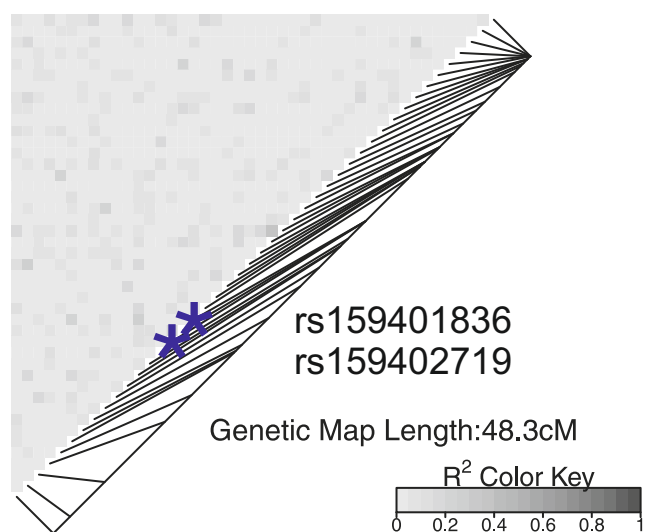

Burrishoole strain LG 6

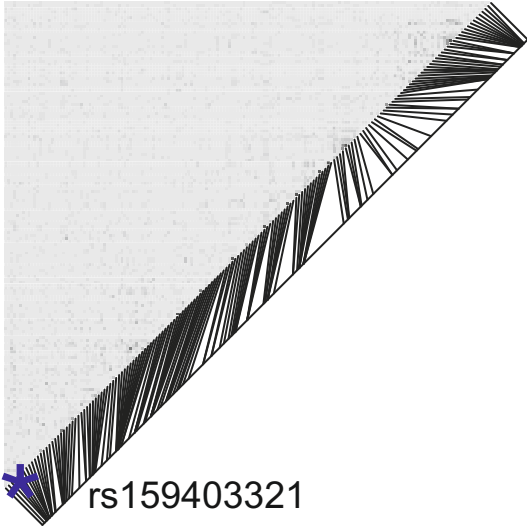

Burrishoole wild LG 6

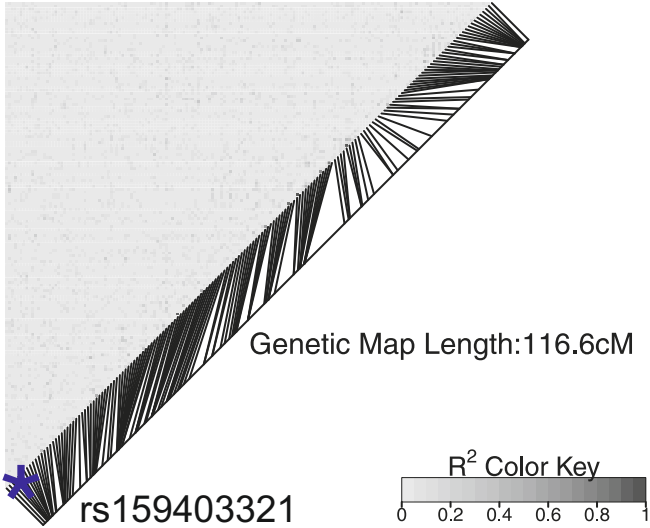

Burrishoole strain LG 11

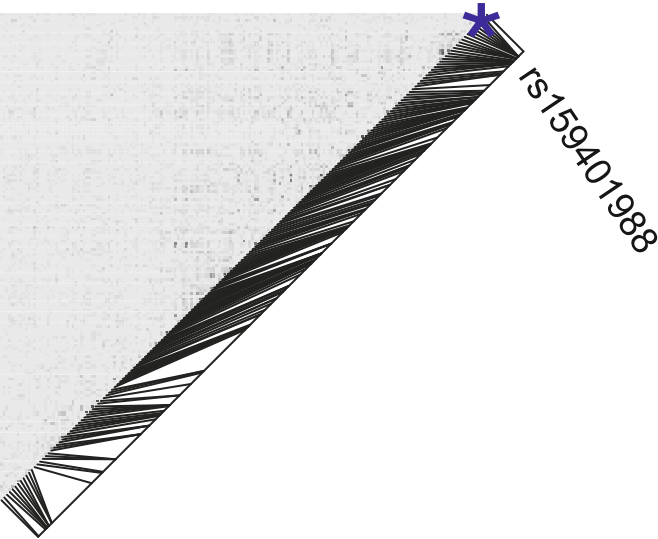

Burrishoole wild LG 11

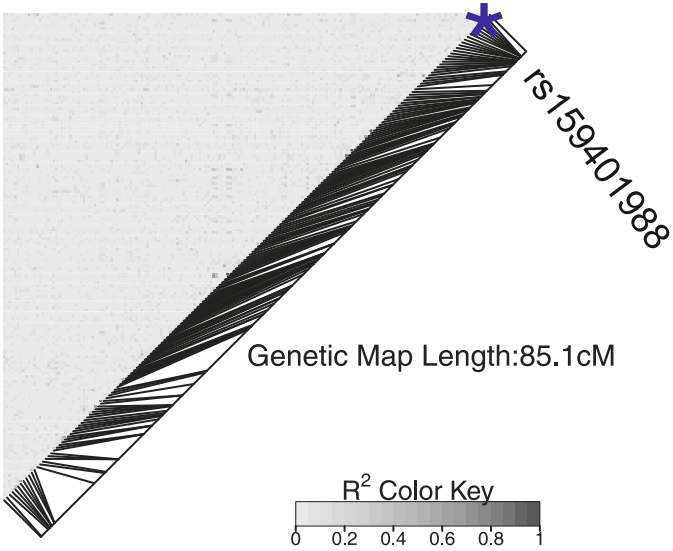

Supplement: Supplementary file 1 [file eva0008-0093-sd1.pdf]
